# Supplementary material
Source: PubMed Central journal article supplement (PMC3533427)
Supplement: supp_112.048397_DMD48397_Supplemental_Table_1.pdf [file supp_112.048397_DMD48397_Supplemental_Table_1.pdf]

Carboxylesterases are uniquely expressed among tissues and regulated by nuclear hormone receptors in the mouse.

Jones RD, Taylor AM, Tong EY, Repa JJ.

*Drug Metabolism and Disposition*

**Supplemental Table 1** Quantitative real-time PCR primer sequences for mouse mRNA measurement.

| Gene                          | Name(s)                                                     | Accession Number | Sequence of Primers (5' to 3')                                | Amplicon position |
|-------------------------------|-------------------------------------------------------------|------------------|---------------------------------------------------------------|-------------------|
| <b>Carboxylesterase Genes</b> |                                                             |                  |                                                               |                   |
| <i>Ces1a</i>                  | Carboxylesterase 1A<br>aka <i>EG244595</i>                  | NM_001013764     | F: CCCTACAGACCTGACAAGCAAAGA<br>R: ATGCTCCACCAGAGAGTAAACCG     | 453-532           |
| <i>Ces1c</i>                  | Carboxylesterase 1C<br>aka <i>Es1, Ces-N</i>                | NM_007954        | F: GCACTACGCTGGGTCCAAGAT<br>R: AAAGATGGTCACGGAATCCG           | 614-679           |
| <i>Ces1d</i>                  | Carboxylesterase 1D<br>aka <i>Ces3</i>                      | NM_053200        | F: ATATGGCTTTCTCTTGCTGCG<br>R: CCCAGGACTTTGCCTTTAACAGT        | 104-189           |
| <i>Ces1e</i>                  | Carboxylesterase 1E<br>aka <i>Es22</i>                      | NM_133660        | F: GATTGGGGATGTGGTATTTCG<br>R: GGGCTCCGGCATCTCTATGT           | 1455-1522         |
| <i>Ces1f</i>                  | Carboxylesterase 1F<br>aka <i>CesMLI, TGH-2</i>             | NM_144930        | F: TTTCAAAGAACAGTAGGCTACCG<br>R: AGAGAGCCCGTCCATCAAAGC        | 416-508           |
| <i>Ces1g</i>                  | Carboxylesterase 1G<br>aka <i>Ces1</i>                      | NM_021456        | F: CGAGTCAGCAGGAGGTGAAAGT<br>R: TTGAAAATGACACTACTCTGAGCG      | 712-810           |
| <i>Ces1h</i>                  | Carboxylesterase 1H<br>aka <i>AK009689</i>                  | XM_134476        | F: CTTTGTGAAGAATGCCACCTCG<br>R: TCTGCCCTAACACTGCATCTTG        | 225-286           |
| <i>Ces2a</i>                  | Carboxylesterase 2A<br>aka <i>Ces6</i>                      | NM_133960        | F: CTCACAGCCGGCCATGT<br>R: AGATTCATTTCTTCGCATCCT              | 336-401           |
| <i>Ces2b</i>                  | Carboxylesterase 2B<br>aka <i>BC015286</i>                  | NM_198171        | F: TCTGAGATGGTCTCCACTACG<br>R: GCAGGGATCATCTGGACAAGC          | 818-954           |
| <i>Ces2c</i>                  | Carboxylesterase 2C<br>aka <i>Ces2</i>                      | NM_145603        | F: GCTGAATGCTGGGTTCTTCG<br>R: GCTGCCTTGGATCTGTCCTGT           | 92-203            |
| <i>Ces2e</i>                  | Carboxylesterase 2E<br>aka <i>Ces5</i>                      | NM_172759        | F: CTTGTCTTTGGCTACCAGTTCG<br>R: TTGCTCCTCTTCCTCAGTGTAAGG      | 1448-1507         |
| <i>Ces2f</i>                  | Carboxylesterase 2F                                         | NM_001079865     | F: TTCAGCGTTCCCATGCTCCT<br>R: CTTGAGTAAACTGGACCTATGCTG        | 1306-1367         |
| <i>Ces2g</i>                  | Carboxylesterase 2G                                         | NM_197999        | F: TCTCTGAGGTGGTTTACCAAACG<br>R: CCTCTCAGACAGCGCACCAG         | 870-954           |
| <i>Ces2h</i>                  | Carboxylesterase 2H                                         | XM_488149        | F: AACTGTCTACGAGGCAAAGCG<br>R: GAGGATGTCTGGGCAGGAAGAT         | 865-967           |
| <i>Ces3a</i>                  | Carboxylesterase 3A<br>aka <i>Es3I</i>                      | NM_198672        | F: GATGGCCTGTCTGCTCCTGATA<br>R: CAGGAAGACATTTACCATGCG         | 73-214            |
| <i>Ces3b</i>                  | Carboxylesterase 3B<br>aka <i>Es3II</i>                     | NM_144511        | F: GGATTGTCACGACCATTATGATG<br>R: CAGAGCCACAGGCCACAGAA         | 796-879           |
| <i>Ces4a</i>                  | Carboxylesterase 4A<br>aka <i>Ces8</i>                      | NM_146213        | F: TCTCAGCAGAGGAGGTGACG<br>R: CACTGGGCTCAGGAACCACAC           | 1036-1136         |
| <i>Ces5a</i>                  | Carboxylesterase 5A<br>aka <i>Ces7</i>                      | NM_001003951     | F: GTTGTACCATCCAGTACCG<br>R: GTCCCAGAAGGCCCAATTCC             | 508-594           |
| <b>Other genes</b>            |                                                             |                  |                                                               |                   |
| <i>Cyclo</i>                  | Cyclophilin, peptidyl-prolyl isomerase B                    | NM_011149        | F: TGGAGAGCACCAAGACAGACA<br>R: TGCCGGAGTCGACAATGAT            | 642-707           |
| <i>Cyp3a11</i>                | Cytochrome P450 3a11                                        | NM_007818        | F: AAAGTGCAGGATGAGATCGATGA<br>R: TCCAGGTATTCCATCTCCATCAC      | 1069-1151         |
| <i>Cyp4a14</i>                | Cytochrome P450 4a14                                        | NM_007822        | F: CCCCTCTAGATTTGCACCAGAT<br>R: TCCCAATGCAGTTCCTTGATC         | 1315-1397         |
| <i>Cyp7a1</i>                 | Cytochrome P450 7a1,<br>Cholesterol 7 $\alpha$ -hydroxylase | NM_007824        | F: AGCAACTAAACAACCTGCCAGTA<br>CTA<br>R: GTCCGGATATTCAAGGATGCA | 1073-1154         |
| <i>Il1<math>\beta</math></i>  | Interleukin 1 $\beta$                                       | NM_008361        | F: CAACCAACAAGTGATATTCTCCATG<br>R: GATCCACACTCTCCAGCTGCA      | 527-678           |
| <i>Tnf</i>                    | Tumor necrosis factor                                       | NM_013693        | F: CTGAGGTCAATCTGCCCAAGTAC<br>R: CTTACAGAGCAATGACTCCAAAG      | 791-866           |
